# Supplementary material
Source: PubMed Central journal article supplement (PMC3134635)
Supplement: NIHMS278329-supplement-1.pdf [file NIHMS278329-supplement-1.pdf]

## SUPPLEMENT

| <b>Table 1. siRNA targets</b> |                                                                                                                                                                                                                                                                                                                                        |
|-------------------------------|----------------------------------------------------------------------------------------------------------------------------------------------------------------------------------------------------------------------------------------------------------------------------------------------------------------------------------------|
| <b>Targets</b>                | <b>Sequences</b>                                                                                                                                                                                                                                                                                                                       |
| Mismatch                      | sense 5'UUC UCC GAA CGU GUC ACG Utt 3'<br>antisense 5'ACG UGA CAC GUU CGG AGA Att 3'                                                                                                                                                                                                                                                   |
| Mouse Brf1<br>siRNA:          | <b>A:</b> sense 5' ACC UUG AGA UUG ACA GAU A dTdT 3'<br>antisense 5' UAU CUG UCA AUC UCA AGG UdTdT 3';<br><b>B:</b> sense 5' AAG CAC UGC CCC ACU UAU UUG dTdT 3'<br>antisense 5' CAA AUA AGU GGG GCA GUG CUU dTdT 3'<br><b>C:</b> sense: 5' AAG CAC UGC CCC ACU UAU UUG dTdT 3'(1)<br>antisense: 5' CAA AUA AGU GGG GCA GUG CUU dTdT3' |

| <b>Table 2. Primer Sets for Quantitative RT-PCR</b> |                                                                                                  |                              |
|-----------------------------------------------------|--------------------------------------------------------------------------------------------------|------------------------------|
| <b>Target</b>                                       | <b>Primers</b>                                                                                   | <b>Annealing Temperature</b> |
| Pre-tRNA <sup>Leu</sup><br>(2)                      | (F) 5'-GTC AGG ATG GCC GAG TGG TCT AAG-3'<br>(R) 5'-CCA CGC CTC CAT ACG GAG AAC CAG AAG ACC C-3' | 61°                          |
| 5S rRNA (3)                                         | (F) 5' GGC CAT ACC ACC CTG AAC GC 3'<br>(R) 5' CAG CAC CCG GTA TTC CCA GG 3'                     | 61°                          |
| 7SL (3)                                             | (F) 5' GTG TCC GCA CTA AGT TCG G-3'<br>(R) 5' TAT TCA CAG GCG CGA TCC-3'                         | 55°                          |
| Mouse TBP                                           | F) 5' GCT AGG TTT CTG CGG TCG CGT C -3'<br>(R) 5' CTG TAC TGA GGC TGC TGC AGT TGC TAC -3'        | 60°                          |
| Mouse Brf1                                          | (F) 5' GGA GCA GAG CCA ATC AAG CCA -3'<br>(R) 5' CAT CAC CAT CAC AGC CGT AAT C -3'               | 62°                          |
| Mouse Bdp1                                          | (F) 5'GCGTGAAGCCAAATGTCAGG3'<br>(R)5'CAATGTGCTGGACTCTGCAGC 3'                                    | 64°                          |
| TFIIIC <sub>63</sub> (3)                            | (F) 5' CGG CAG ATG TTC TAC CAG TTA TGC G 3'<br>(R) 5' ATG GCT TGA AGT CCT CCT CC 3'              | 64°                          |
| GAPDH (3)                                           | (F) 5'-TCC ACC ACC CTG TTG CTG TA-3'<br>(R) 5'-ACC ACA GTC CAT GCC ATC AC-3'                     | 61°                          |

Abbreviations: (F) = forward, (R) = reverse.

| <b>Table 3 Primer Sets for CHIP</b> |                                                                              |                              |
|-------------------------------------|------------------------------------------------------------------------------|------------------------------|
| <b>Target</b>                       | <b>Primers</b>                                                               | <b>Annealing Temperature</b> |
| Brf1 promoter<br>-71/+98            | (F) 5' CAG TCC CGC CCC GTT GTT G 3'<br>(R) 5' TGC GGG CCG CGC TGC CTG CAA 3' | 64°                          |

|                                 |                                                                                                     |     |
|---------------------------------|-----------------------------------------------------------------------------------------------------|-----|
| Brf1 promoter<br>-507/-346      | (F) 5' GGC AGT CCT TGA TCC TGC C 3'<br>(R) 5' GTA GTG GGA TGG GTT TGT GG 3'                         | 63° |
| tRNA <sup>Leu</sup> gene<br>(2) | (F) 5'-GTC AGG ATG GCC GAG TGG TCT AAG-3'<br>(R) 5'-CCA CGC CTC CAT ACG GAG AAC CAG AAG<br>ACC C-3' | 61° |
| 5S rRNA (3)                     | (F) 5' GGC CAT ACC ACC CTG AAC GC 3'<br>(R) 5' CAG CAC CCG GTA TTC CCA GG 3'                        | 61° |

**ChIP assay.** Chromatin immunoprecipitation (ChIP) assays were performed as described previously (4). Cells were treated with 20ng/ml EGF prior to cross-linking with formaldehyde. Briefly, chromatin was precleared with protein A/G plus agarose beads for 30 min at 4°C prior to adding antibodies or control antibody overnight. Protein A/G plus agarose beads were added for 3 h, and the immunocomplex was isolated. The cross-links were reversed by incubating the mixture with 0.3 M NaCl at 65°C overnight. DNAs were extracted with phenol/chloroform. Real-time PCR was performed using the isolated DNA and SYBR green supermix (Bio-Rad) on an MX3000P system (Stratagene). The primer sequences that were used are shown in Table 3 in Supplementary Data. The fold change in promoter occupancy was calculated by setting the level of promoter occupancy in the cells without EGF treatment at 1.

### Supplemental References

1. Johnson SA, Dubeau L, Johnson DL. (2008b). Enhanced RNA polymerase III-dependent transcription is required for oncogenic transformation. *J Biol Chem.* **283**:19184-19191.
2. Crighton, D., Woiwode, A., Zhang, C., Mandavia, N., Morton, J.P., Warnock, L.J. *et al*, (2003). p53 represses RNA polymerase III transcription by targeting TBP and inhibiting promoter occupancy by TFIIB. *EMBO J.* **22**, 2810–2820.
3. Winter AG, Sourvinos G, Allison SJ, Tosh K, Scott PH, Spandidos DA, et al (2000). RNA polymerase III transcription factor TFIIC2 is overexpressed in ovarian tumors. *Proc Natl Acad Sci U S A.* **97**:12619-24,
4. Zhong, S., D.L. Johnson. (2009) The JNKs differentially regulate RNA polymerase III transcription by coordinately modulating the expression of all TFIIB subunits. *Proc Natl Acad Sci U S A.* **106**:12682-12687.
